# Supplementary material
Source: MDPI journal article supplement (https://www.mdpi.com/2311-5637/8/7/339)
Supplement: s1 [file s1]

**Glycerol utilization as a sole carbon source disrupts the membrane architecture and solventogenesis in *Clostridium beijerinckii* NCIMB 8052**

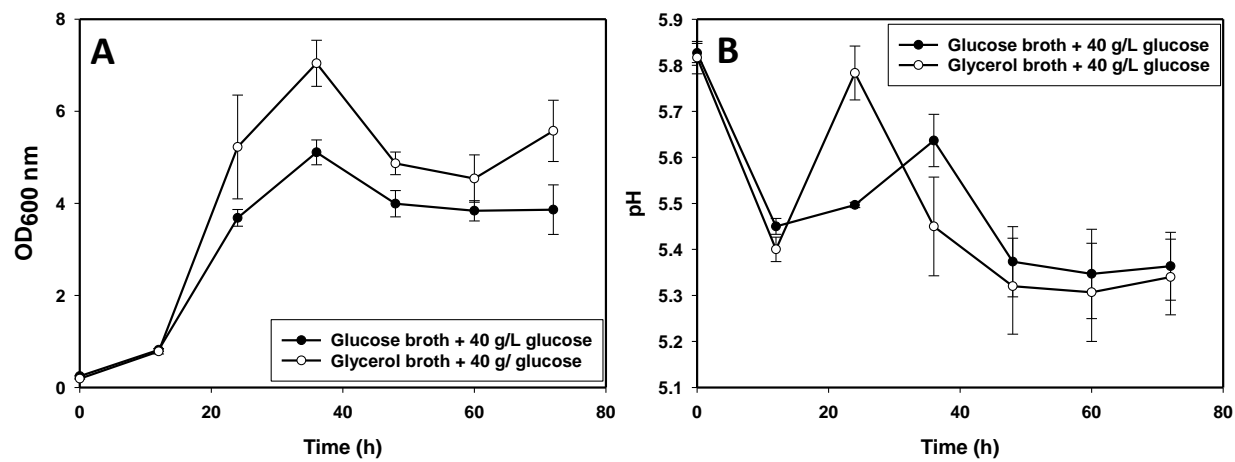

**Figure S1.** Optical density and culture pH of *C. beijerinckii* grown in culture broth following initial growth of the organism for 24 h on glycerol or glucose. **A:** optical density, **B:** culture pH.

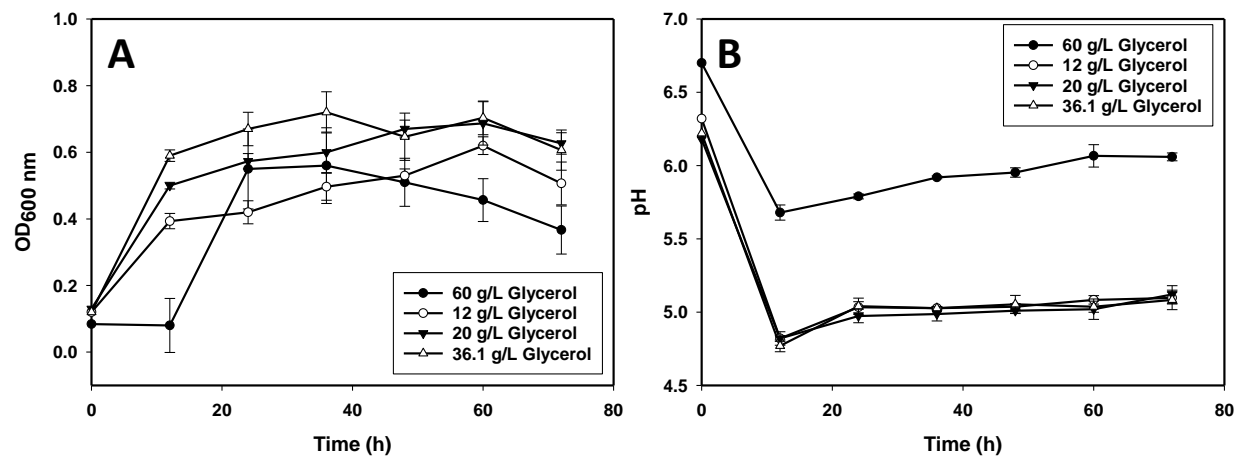

**Figure S2.** Optical density and culture pH of *C. beijerinckii*-pre-grown glycerol and glucose culture broths with additional supply of 40 g/L glucose. **A:** optical density, **B:** culture pH.

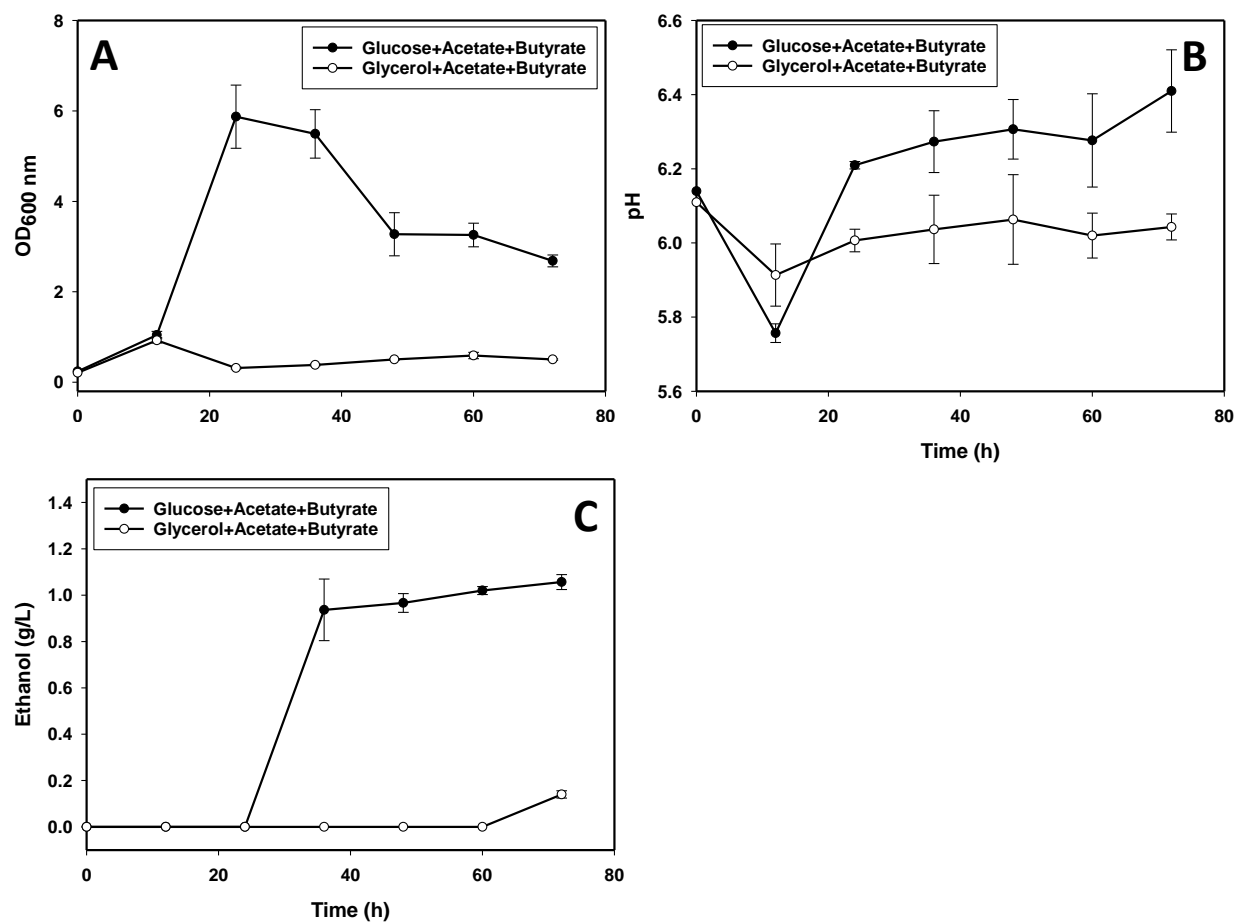

**Figure S3.** Optical density, pH and ethanol profiles of *C. beijerinckii* grown on glycerol and glucose as a sole carbon source with the supply of 6 and 3.5 g/L acetate and butyrate. **A:** optical density, **B:** culture pH, **C:** ethanol profile.

**Table S1.** List of compounds detected in cultures of *C. beijerinckii* grown on glycerol or glucose

| Compound                                       | Glu+A           |                  | Gly+A           |                  | Gly-A           |                  |
|------------------------------------------------|-----------------|------------------|-----------------|------------------|-----------------|------------------|
|                                                | Cell<br>extract | Broth<br>extract | Cell<br>extract | Broth<br>extract | Cell<br>extract | Broth<br>extract |
| Butanol                                        | +               | +                | -               | -                | -               | -                |
| 2,2-Dimethoxybutane                            | +               | -                | +               | -                | +               | +                |
| Butyric acid                                   | +               | +                | +               | +                | +               | +                |
| Phenol                                         | +               | +                | -               | -                | -               | -                |
| Phthalic acid                                  | +               | -                | -               | -                | -               | -                |
| Cyclopentaneundecanoic acid, methyl ester      | +               | -                | -               | -                | -               | -                |
| Tetradecanoic acid                             | +               | +                | +               | -                | +               | -                |
| Cyclopentadecane                               | +               | -                | -               | -                | -               | -                |
| Hexadecanoic acid, methyl ester                | +               | -                | +               | -                | +               | -                |
| n-Hexadecanoic acid                            | +               | +                | +               | +                | +               | -                |
| Hexadecanoic acid, butyl ester                 | +               | -                | -               | -                | -               | -                |
| Glycerol                                       | -               | -                | +               | +                | +               | +                |
| Cyclopentane                                   | -               | -                | +               | -                | -               | -                |
| Acetate                                        | -               | +                | +               | +                | -               | -                |
| Cyclotetradecane                               | -               | -                | +               | -                | -               | -                |
| Crotonaldehyde                                 | -               | -                | +               | -                | -               | -                |
| Propanamide                                    | -               | -                | +               | -                | -               | -                |
| Benzoic acid                                   | +               | +                | +               | +                | +               | +                |
| 1,13-Tetradecadiene                            | -               | -                | -               | -                | +               | -                |
| 9-Octadecene                                   | -               | -                | -               | -                | +               | -                |
| 1,5,9-Cyclododecatriene                        | -               | -                | -               | -                | +               | -                |
| 1-Octadecene                                   | -               | +                | -               | -                | -               | -                |
| 1,2,3,4-Butanetetrol, [S-(R*,R*)]- dl-threitol | -               | -                | -               | +                | -               | -                |
| 1,15-Hexadecadiene                             | -               | -                | -               | -                | -               | +                |
| 5-Octadecene                                   | -               | -                | -               | -                | -               | +                |

Glu+A = glucose + acetate; Gly+A = glycerol + acetate; Gly-A = glycerol – acetate.

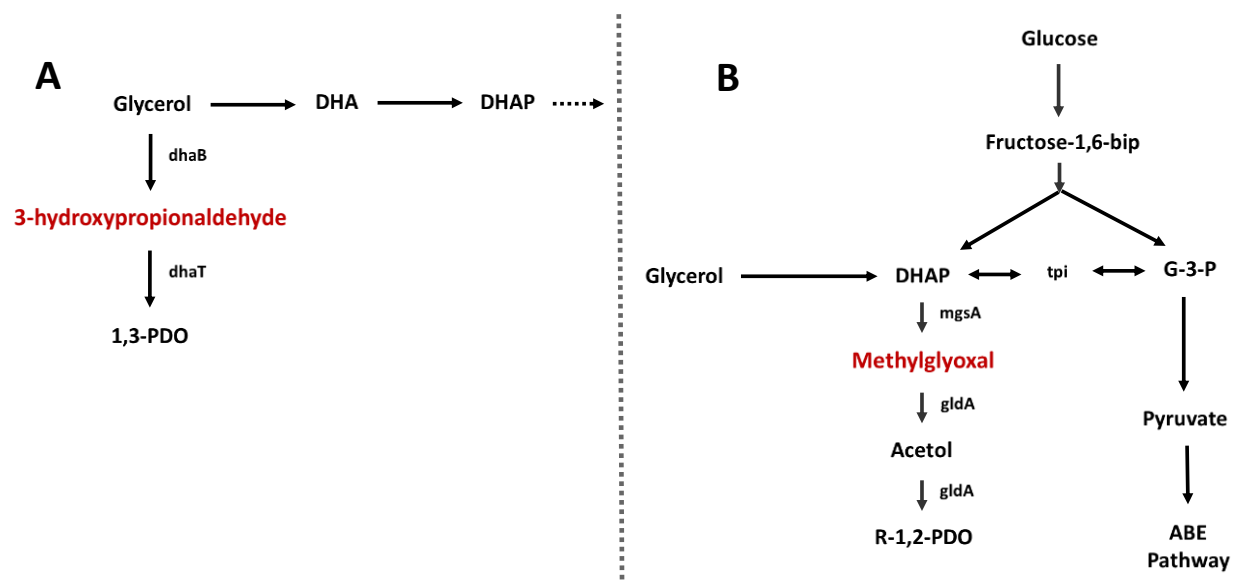

**Figure S4.** Possible pathways that may lead to accumulation of toxic intermediates in cultures of *C. beijerinckii* grown solely on glycerol. **A:** The toxic metabolite 3-hydroxypropionaldehyde may accumulate via an uncharacterized incomplete 1,3-PDO pathway. **B:** Methylglyoxal may accumulate due to weak or incomplete transformation to 1,2-PDO. dhaB – glycerol dehydratase, dhaT – 1,3-PDO dehydrogenase, mgsA – methylglyoxal synthase, gldA – glycerol dehydrogenase.
